# Supplementary material for: Evidence that alternative transcriptional initiation is largely nonadaptive
Source: PubMed Central journal article supplement (PMC6438578; doi:10.1371/journal.pbio.3000197), 2019-03-18

**A**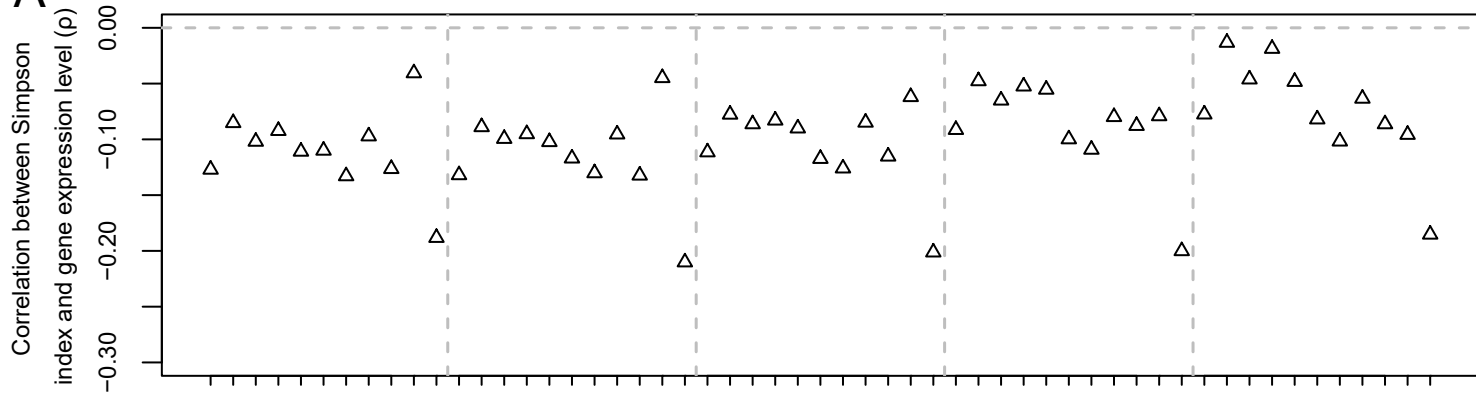**B**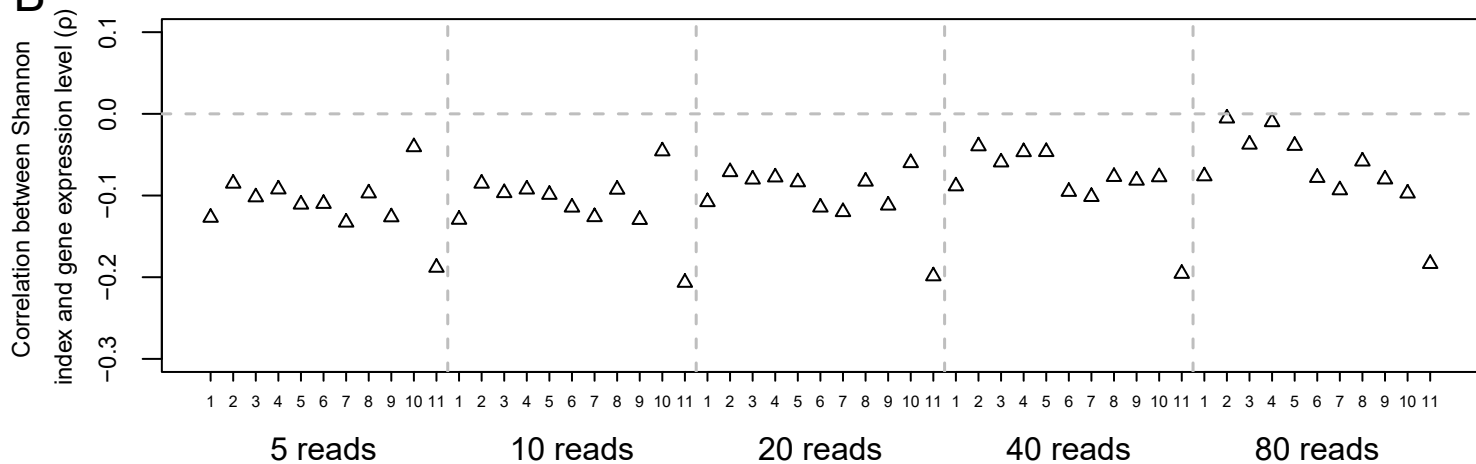

Supplement: pbio.3000197.s005.pdf [file pbio.3000197.s005.pdf]
