# Supplementary material for: Evidence that alternative transcriptional initiation is largely nonadaptive
Source: PubMed Central journal article supplement (PMC6438578; doi:10.1371/journal.pbio.3000197), 2019-03-18

Fraction of genes with  
positive  $\rho$  (% use of ranked  
TSS, expression level)

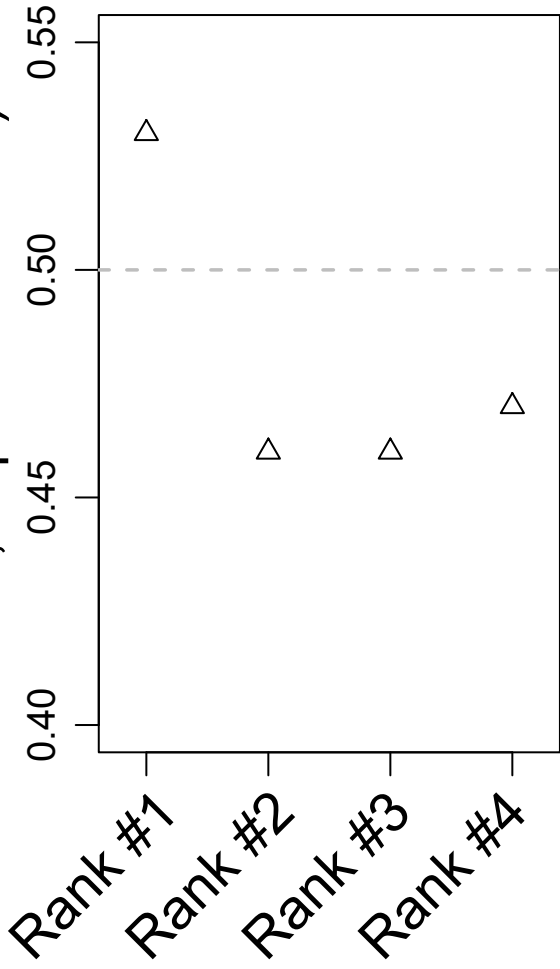

Supplement: pbio.3000197.s010.pdf [file pbio.3000197.s010.pdf]
