# Supplementary material for: Evidence that alternative transcriptional initiation is largely nonadaptive
Source: PubMed Central journal article supplement (PMC6438578; doi:10.1371/journal.pbio.3000197), 2019-03-18
Supplement: pbio.3000197.s012.pdf [file pbio.3000197.s012.pdf]

**S1 Table. 5'-end sequencing datasets used in this study.**

| Technique | Species | Database         | Library   | Sample ID | Sample              | Type      | Link                                                                                                                                                                    |
|-----------|---------|------------------|-----------|-----------|---------------------|-----------|-------------------------------------------------------------------------------------------------------------------------------------------------------------------------|
| CAGE-seq  | human   | FANTOM5_phase1.3 | CNhs11275 | 1         | A549                | cell line |                                                                                                                                                                         |
| CAGE-seq  | human   | FANTOM5_phase1.3 | CNhs12326 | 2         | HelaS3              | cell line |                                                                                                                                                                         |
| CAGE-seq  | human   | FANTOM5_phase1.3 | CNhs12330 | 3         | HepG2               | cell line | <a href="http://fantom.gsc.riken.jp/5/datafiles/phase1.3/basic/human.cell_line.hCAGE/">http://fantom.gsc.riken.jp/5/datafiles/phase1.3/basic/human.cell_line.hCAGE/</a> |
| CAGE-seq  | human   | FANTOM5_phase1.3 | CNhs12335 | 4         | K562                | cell line |                                                                                                                                                                         |
| CAGE-seq  | human   | FANTOM5_phase1.3 | CNhs11943 | 5         | MCF7                | cell line |                                                                                                                                                                         |
| CAGE-seq  | human   | FANTOM5_phase1.3 | CNhs10616 | 1         | Bladder             | tissue    |                                                                                                                                                                         |
| CAGE-seq  | human   | FANTOM5_phase1.3 | CNhs10617 | 2         | Brain               | tissue    |                                                                                                                                                                         |
| CAGE-seq  | human   | FANTOM5_phase1.3 | CNhs10621 | 3         | Heart               | tissue    |                                                                                                                                                                         |
| CAGE-seq  | human   | FANTOM5_phase1.3 | CNhs10622 | 4         | Kidney              | tissue    |                                                                                                                                                                         |
| CAGE-seq  | human   | FANTOM5_phase1.3 | CNhs10624 | 5         | Liver               | tissue    |                                                                                                                                                                         |
| CAGE-seq  | human   | FANTOM5_phase1.3 | CNhs10625 | 6         | Lung                | tissue    | <a href="http://fantom.gsc.riken.jp/5/datafiles/phase1.3/basic/human.tissue.hCAGE/">http://fantom.gsc.riken.jp/5/datafiles/phase1.3/basic/human.tissue.hCAGE/</a>       |
| CAGE-seq  | human   | FANTOM5_phase1.3 | CNhs10626 | 7         | Ovary               | tissue    |                                                                                                                                                                         |
| CAGE-seq  | human   | FANTOM5_phase1.3 | CNhs10629 | 8         | Muscle              | tissue    |                                                                                                                                                                         |
| CAGE-seq  | human   | FANTOM5_phase1.3 | CNhs10631 | 9         | Spleen              | tissue    |                                                                                                                                                                         |
| CAGE-seq  | human   | FANTOM5_phase1.3 | CNhs10632 | 10        | Testis              | tissue    |                                                                                                                                                                         |
| CAGE-seq  | human   | FANTOM5_phase1.3 | CNhs10612 | 11        | Universal           | tissue    |                                                                                                                                                                         |
| CAGE-seq  | mouse   | FANTOM5_phase1.3 | CNhs10481 | 1         | Bladder             | tissue    |                                                                                                                                                                         |
| CAGE-seq  | mouse   | FANTOM5_phase1.3 | CNhs10473 | 2         | Cortex              | tissue    |                                                                                                                                                                         |
| CAGE-seq  | mouse   | FANTOM5_phase1.3 | CNhs10482 | 3         | Diencephalon        | tissue    |                                                                                                                                                                         |
| CAGE-seq  | mouse   | FANTOM5_phase1.3 | CNhs10478 | 4         | Hippocampus         | tissue    |                                                                                                                                                                         |
| CAGE-seq  | mouse   | FANTOM5_phase1.3 | CNhs10474 | 5         | Lung                | tissue    |                                                                                                                                                                         |
| CAGE-seq  | mouse   | FANTOM5_phase1.3 | CNhs10477 | 6         | Medulla oblongata   | tissue    | <a href="http://fantom.gsc.riken.jp/5/datafiles/phase1.3/basic/mouse.tissue.hCAGE/">http://fantom.gsc.riken.jp/5/datafiles/phase1.3/basic/mouse.tissue.hCAGE/</a>       |
| CAGE-seq  | mouse   | FANTOM5_phase1.3 | CNhs10507 | 7         | Ovary               | tissue    |                                                                                                                                                                         |
| CAGE-seq  | mouse   | FANTOM5_phase1.3 | CNhs10505 | 8         | Spinal cord         | tissue    |                                                                                                                                                                         |
| CAGE-seq  | mouse   | FANTOM5_phase1.3 | CNhs10465 | 9         | Spleen              | tissue    |                                                                                                                                                                         |
| CAGE-seq  | mouse   | FANTOM5_phase1.3 | CNhs10504 | 10        | Testis              | tissue    |                                                                                                                                                                         |
| CAGE-seq  | mouse   | FANTOM5_phase1.3 | CNhs10613 | 11        | Universal           | tissue    |                                                                                                                                                                         |
| TSS-seq   | human   | DBTSS_version_9  | NA        | 1         | Adipose             | tissue    |                                                                                                                                                                         |
| TSS-seq   | human   | DBTSS_version_9  | NA        | 2         | Adrenal             | tissue    |                                                                                                                                                                         |
| TSS-seq   | human   | DBTSS_version_9  | NA        | 3         | Brain (two repeats) | tissue    |                                                                                                                                                                         |
| TSS-seq   | human   | DBTSS_version_9  | NA        | 4         | Brain (two repeats) | tissue    |                                                                                                                                                                         |
| TSS-seq   | human   | DBTSS_version_9  | NA        | 5         | Breast              | tissue    | <a href="ftp://ftp.hgc.jp/pub/hgc/db/dbtss/dbtss_ver9/hg38/TSSseq/tsc_data/Adult/">ftp://ftp.hgc.jp/pub/hgc/db/dbtss/dbtss_ver9/hg38/TSSseq/tsc_data/Adult/</a>         |
| TSS-seq   | human   | DBTSS_version_9  | NA        | 6         | Colon               | tissue    |                                                                                                                                                                         |
| TSS-seq   | human   | DBTSS_version_9  | NA        | 7         | Heart               | tissue    |                                                                                                                                                                         |
| TSS-seq   | human   | DBTSS_version_9  | NA        | 8         | Kidney              | tissue    |                                                                                                                                                                         |
| TSS-seq   | human   | DBTSS_version_9  | NA        | 9         | Liver               | tissue    |                                                                                                                                                                         |
| TSS-seq   | human   | DBTSS_version_9  | NA        | 10        | Lung                | tissue    |                                                                                                                                                                         |

|         |       |                   |    |    |           |           |                                                                                                                                                                                     |
|---------|-------|-------------------|----|----|-----------|-----------|-------------------------------------------------------------------------------------------------------------------------------------------------------------------------------------|
| TSS-seq | human | DBTSS_version_9   | NA | 11 | Lymph     | tissue    |                                                                                                                                                                                     |
| TSS-seq | human | DBTSS_version_9   | NA | 12 | Muscle    | tissue    |                                                                                                                                                                                     |
| TSS-seq | human | DBTSS_version_9   | NA | 13 | Ovary     | tissue    |                                                                                                                                                                                     |
| TSS-seq | human | DBTSS_version_9   | NA | 14 | Prostate  | tissue    |                                                                                                                                                                                     |
| TSS-seq | human | DBTSS_version_9   | NA | 15 | Testis    | tissue    |                                                                                                                                                                                     |
| TSS-seq | human | DBTSS_version_9   | NA | 16 | Thyroid   | tissue    |                                                                                                                                                                                     |
| TSS-seq | human | DBTSS_version_9   | NA | 1  | A427      | cell line |                                                                                                                                                                                     |
| TSS-seq | human | DBTSS_version_9   | NA | 2  | A549      | cell line |                                                                                                                                                                                     |
| TSS-seq | human | DBTSS_version_9   | NA | 3  | ABC1      | cell line |                                                                                                                                                                                     |
| TSS-seq | human | DBTSS_version_9   | NA | 4  | H1299     | cell line |                                                                                                                                                                                     |
| TSS-seq | human | DBTSS_version_9   | NA | 5  | H1437     | cell line |                                                                                                                                                                                     |
| TSS-seq | human | DBTSS_version_9   | NA | 6  | H1648     | cell line |                                                                                                                                                                                     |
| TSS-seq | human | DBTSS_version_9   | NA | 7  | H1650     | cell line |                                                                                                                                                                                     |
| TSS-seq | human | DBTSS_version_9   | NA | 8  | H1703     | cell line |                                                                                                                                                                                     |
| TSS-seq | human | DBTSS_version_9   | NA | 9  | H1819     | cell line |                                                                                                                                                                                     |
| TSS-seq | human | DBTSS_version_9   | NA | 10 | H1975     | cell line |                                                                                                                                                                                     |
| TSS-seq | human | DBTSS_version_9   | NA | 11 | H2126     | cell line |                                                                                                                                                                                     |
| TSS-seq | human | DBTSS_version_9   | NA | 12 | H2228     | cell line |                                                                                                                                                                                     |
| TSS-seq | human | DBTSS_version_9   | NA | 13 | H2347     | cell line | <a href="ftp://ftp.hgc.jp/pub/hgc/db/dbtss/dbtss_ver9/hg38/TSSseq/tsc_data/LA_Cell_line_26/">ftp://ftp.hgc.jp/pub/hgc/db/dbtss/dbtss_ver9/hg38/TSSseq/tsc_data/LA_Cell_line_26/</a> |
| TSS-seq | human | DBTSS_version_9   | NA | 14 | H322      | cell line |                                                                                                                                                                                     |
| TSS-seq | human | DBTSS_version_9   | NA | 15 | II18      | cell line |                                                                                                                                                                                     |
| TSS-seq | human | DBTSS_version_9   | NA | 16 | LC2ad     | cell line |                                                                                                                                                                                     |
| TSS-seq | human | DBTSS_version_9   | NA | 17 | PC14      | cell line |                                                                                                                                                                                     |
| TSS-seq | human | DBTSS_version_9   | NA | 18 | PC3       | cell line |                                                                                                                                                                                     |
| TSS-seq | human | DBTSS_version_9   | NA | 19 | PC7       | cell line |                                                                                                                                                                                     |
| TSS-seq | human | DBTSS_version_9   | NA | 20 | PC9       | cell line |                                                                                                                                                                                     |
| TSS-seq | human | DBTSS_version_9   | NA | 21 | RERFLCad1 | cell line |                                                                                                                                                                                     |
| TSS-seq | human | DBTSS_version_9   | NA | 22 | RERFLCad2 | cell line |                                                                                                                                                                                     |
| TSS-seq | human | DBTSS_version_9   | NA | 23 | RERFLCKJ  | cell line |                                                                                                                                                                                     |
| TSS-seq | human | DBTSS_version_9   | NA | 24 | RERFLCMS  | cell line |                                                                                                                                                                                     |
| TSS-seq | human | DBTSS_version_9   | NA | 25 | RERFLCOK  | cell line |                                                                                                                                                                                     |
| TSS-seq | human | DBTSS_version_9   | NA | 26 | VMRCLCD   | cell line |                                                                                                                                                                                     |
| GRO-cap | human | Core et al., 2014 | NA | NA | K562      | cell line | <a href="https://www.ncbi.nlm.nih.gov/geo/query/acc.cgi?acc=GSE60456">https://www.ncbi.nlm.nih.gov/geo/query/acc.cgi?acc=GSE60456</a>                                               |
