# Supplementary material for: Evidence that alternative transcriptional initiation is largely nonadaptive
Source: PubMed Central journal article supplement (PMC6438578; doi:10.1371/journal.pbio.3000197), 2019-03-18
Supplement: pbio.3000197.s013.pdf [file pbio.3000197.s013.pdf]

**S2 Table. Correlations between gene expression level and TSS diversity or relative usage of a ranked TSS in simulated data.**

| Quantity being correlated with gene expression level | $\rho$ (before down-sampling) | $P$ (before down-sampling) | $\rho$ (after down-sampling) | $P$ (after down-sampling) |
|------------------------------------------------------|-------------------------------|----------------------------|------------------------------|---------------------------|
| Simpson index of TSS diversity                       | 0.0276                        | 0.0011                     | 0.0081                       | 0.3388                    |
| Shannon index of TSS diversity                       | 0.0859                        | $3.3 \times 10^{-24}$      | 0.0065                       | 0.4460                    |
| Relative usage of TSS of rank #1                     | -0.0165                       | 0.0512                     | -0.0089                      | 0.2920                    |
| Relative usage of TSS of rank #2                     | -0.0245                       | 0.0046                     | 0.0127                       | 0.1429                    |
| Relative usage of TSS of rank #3                     | -0.0322                       | 0.0003                     | 0.0237                       | 0.0080                    |
| Relative usage of TSS of rank #4                     | -0.0096                       | 0.3026                     | 0.0040                       | 0.6659                    |
